# Supplementary material
Source: PubMed Central journal article supplement (PMC2895102)
Supplement: 1006085107_pnas.1006085107_SI.pdf [file 1006085107_pnas.1006085107_SI.pdf]

# Supporting Information

Zhuo et al. 10.1073/pnas.1006085107

## SI Text

**SI Materials and Methods. Strains, media, and genetic manipulation.** *Escherichia coli* strains DH5a and BL21 (DE3) (Novagen) were used as hosts for the construction of the mutant fragment library and for the expression of the HrdB protein, respectively. Intergeneric conjugation from *E. coli* ET12567 (pUZ8002) to *Streptomyces avermitilis* was performed as described previously (1). Manipulations of *Streptomyces* and *E. coli* were performed following standard procedures (1, 2).

**Microarray construction, RNA isolation, labeling, hybridization, and scanning.** A mini-DNA chip was constructed with spots, in triplicate, of 500 gene-specific oligonucleotides based on the publicly available complete genome information of *S. avermitilis*. Five milliliters of culture broths from a 96-h fermentation culture (3) were used for RNA isolation. RNA was isolated using the Trizol reagent (Invitrogen) according to the manufacturer's instructions. The RNA was subsequently purified by QIAGEN RNeasy Mini Kit, and the quality and quantity of the purified RNA was determined by nanodrop UV spectroscopy (Ocean Optics). Then, 6  $\mu$ g of RNA from 3-115 and wild-type strains were used to synthesize cDNA labeled with Cy5 and Cy3, respectively. The labeled cDNA samples were concentrated and purified by QIAquick Nucleotide Removal Kit. Hybridization was performed as described previously (4) in an Agilent Microarray Hybridization Chamber (G2534A) for 16 h at 65 °C. After hybridization, the slides were washed in Gene Expression Wash Buffer (Agilent). Microarrays were scanned on a GenePix 4000B (Axon Instruments). Microarray data extraction and analysis was performed as described previously (5).

**Real-time RT-PCR analysis.** Real-time RT-PCR was performed to confirm the result of transcriptional profiling. First-strand cDNA was synthesized from 1  $\mu$ g total RNA in a 20- $\mu$ L reaction volume using a cDNA synthesis kit (Takara) according to the manufacturer's instructions. Real-time PCR reactions were performed using SYBR Green I (Takara) on the Applied Biosystems 7300 Real-Time PCR System (Applied Biosystems Inc.). Gene-specific primers were designed using Primer 3.0 (Table S4). The change in fluorescence of SYBR Green I in every cycle was monitored by the system software and the threshold cycle ( $C_T$ ) was measured. We used 16S rRNA as an internal control and the relative gene expression level was calculated using the formula  $2^{-\Delta\Delta C_T}$ , where  $\Delta C_T$  was the  $C_T$  value of interesting genes minus that of internal control and  $\Delta\Delta C_T$  was the mean  $\Delta C_T$  value of the interest strain minus that of the reference strain.

**Protein expression, purification, and in vitro transcription assays.** DNA encoding full-length HrdB protein (amino acids 1–512) was cloned into pET28b (Novagen) and confirmed by sequencing. *E. coli* BL21 (DE3) cells transformed with the expression plasmid were grown to log phase, induced with 0.5 mM isopropyl-1-thio-B-D-galactopyranoside, and harvested by centrifugation 5 h after induction. The cell pellets were rinsed with phosphate-buffered saline (pH 8.0, PBS) and resuspended in PBS buffer at 5 mL per gram wet weight. The cells were sonicated at 15  $\times$  3 s with 7-s pauses at 300 W and centrifuged at 10,000  $\times$  g for 30 min at 4 °C. The supernatant was adjusted to the same pH and composition as the binding buffer (20 mM sodium phosphate, 0.5 M NaCl, 20 mM imidazole, pH 8.0) and loaded onto a Ni-NTA Agarose column (GE Healthcare, HisTrap HP, No. 17-5247-01). The column was washed with five column volumes

of binding buffer, followed by elution with a gradient of imidazole (50–500 mM). The eluted fractions were analyzed by gel filtration chromatography on a column (10  $\times$  300 mm) of Superdex 75 eluted with TM buffer (20 mM Tris-HCl, pH 7.8 at 4 °C, 10 mM MgCl<sub>2</sub>, 10 mM KCl, 0.1 mM EDTA) at a flow rate of 0.4 mL/min in a FPLC system (GE Healthcare). SDS-PAGE was used to monitor the flow-through. Protein was quantified by Bradford Assay Kit (Beyotime Ltd. Co.).

DNA fragments of the promoter region were amplified from strain 3-115 genomic DNA using primers described in Table S4. DNA fragments were kept at 1.5 pmol final concentration, and  $\sigma^{HrdB}$  protein was added at different concentrations. Briefly, 0.25 unit of *E. coli* RNA polymerase core enzyme (EPICENTRE) mixed with 1.5 pmol  $\sigma^{HrdB}$  was incubated with 1.5-pmol template DNA in 16- $\mu$ L transcription buffer (80 mM Hepes-KOH (pH 7.5), 32 mM MgCl<sub>2</sub>, 2 mM spermidine, 40 mM DTT) at 37 °C for 20 min to form open complexes. RNA synthesis was initiated by adding 4  $\mu$ L of NTP-heparin mixture (0.32 mM ATP, CTP, GTP; 0.1 mM UTP; 3 mg heparin; and 2  $\mu$ Ci [ $\alpha$ -<sup>32</sup>P]UTP). After 20-min incubation at 37 °C, transcripts were separated in 7.5 M urea polyacrylamide gel electrophoresis and detected by autoradiography.

**Library construction, high-throughput screening (HTS) screening, and titer measurements.** The *hrdB* gene with its native promoter region was amplified from *S. avermitilis* ATCC31267 genomic DNA using primers XAPI and EAP2. The amplified fragment, confirmed by sequencing, was digested by *Xba*I and *Eco*RI and inserted into pSET152 to generate pZY126. Fragment mutagenesis was performed using the GeneMorph® II EZClone Domain Mutagenesis Kit (Stratagene) as described in the manufacturer's instructions with the following modifications: 100–500 ng of pZY126 DNA was used as the initial template, and the DNA coding the full-length HrdB protein was amplified using primers AP3 and AP4. Plasmids containing mutant *hrdB* genes were directly transformed into competent *E. coli* ET12567 (pUZ8002) cells. Cells were spread on LB-agar plates containing 50  $\mu$ g/mL apramycin and 25  $\mu$ g/mL chloramphenicol. Clones that survived antibiotic selection were scraped off to create a liquid library. The plasmid library was conjugation-transferred into strain 3-115 following standard procedures.

The HTS screening, fermentation (Erlenmeyer flasks and fermentor), and avermectin analysis of mutants were performed as described previously (6, 7). The parental strain 3-115 was simultaneously cultured, and its production was used as a control. The production of avermectins in strain C1 containing only a blank pSET152 and in strain C2 with an additional copy of the *hrdB* gene was also investigated. The stability of those yield-improved strains were tested through three iterations of shake flask fermentation.

**Fragment rescue and sequence analysis.** Genomic DNA of the yield-improved strains was isolated and completely digested by *Pst*I; the digested fragments containing mutant *hrdB* gene were purified and self-ligated. The self-ligation products were introduced into *E. coli*, and colonies that survived apramycin selection were selected. Plasmids from those colonies were digested by *Xba*I and *Eco*RI and inserted into pSET152 to generate pSET152::*hrdBm*, which was introduced into *E. coli* ET12567 (pUZ8002) and then conjugationally transferred into 3-115. The fermentation and avermectin production analysis of these transformants were performed and analyzed. At the same time, the *Xba*I-*Eco*RI

fragments were inserted into pUC18 for sequencing. The predicted amino acid sequences were aligned with the wild-type HrdB<sup>ATCC31267</sup>, and mutant sites were shown in the correspond-

ing location. The conserved functional domains proposed by Marcos (8) were also presented. Sequences were aligned and compared using Clustal W version 1.82.

1. Kieser T, Bibb MJ, Buttner MJ, Chater KF, Hopwood DA (2000) *Practical Streptomyces Genetics: A Laboratory Manual* (John Innes Foundation, Norwich).
2. Sambrook J, Russell D (2001) *Molecular Cloning: A Laboratory Manual* (Cold Spring Harbor Lab Press, Cold Spring Harbor, NY), 3rd Ed.
3. Gao H, et al. (2009) Medium optimization for the production of avermectin B1a by *Streptomyces avermitilis* 14-12A using response surface methodology. *Bioresour Technol* 100:4012–4016.
4. Xu Z, et al. (2006) cDNA microarray analysis of differential gene expression and regulation in clinically drug-resistant isolates of *Candida albicans* from bone marrow transplanted patients. *Int J Med Microbiol* 296:421–434.
5. Ye BC, et al. (2009) Time-resolved transcriptome analysis of *Bacillus subtilis* responding to valine, glutamate, and glutamine. *PLoS ONE* 4:e7073.
6. Zhang L, et al. (2007) High-throughput synergy screening identifies microbial metabolites as combination agents for the treatment of fungal infections. *Proc Natl Acad Sci USA* 104:4606–4611.
7. Gao H, et al. (2009) Identification of avermectin-high-producing strains by high-throughput screening methods. *Appl Microbiol Biotechnol* 85:1219–1225.
8. Marcos AT, et al. (1995) Three genes *hrdB*, *hrdD* and *hrdT* of *Streptomyces griseus* IMRU 3570, encoding sigma factor-like proteins, are differentially expressed under specific nutritional conditions. *Gene* 153:41–48.

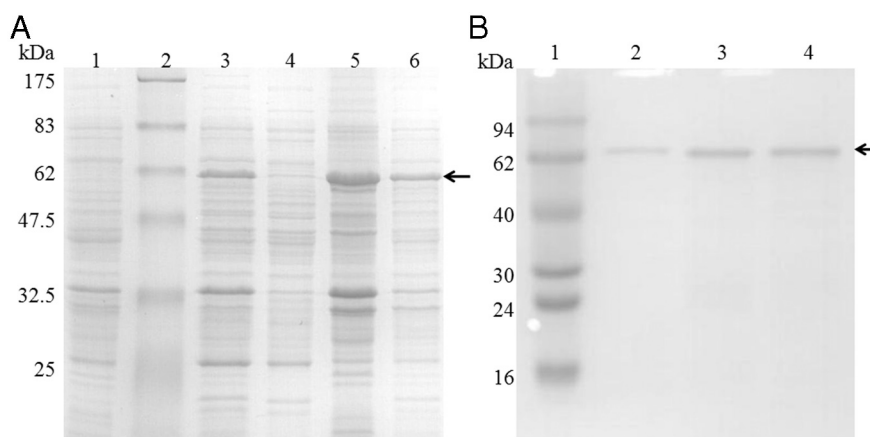

**Fig. S1.** Expression and purification of recombinant His6-HrdB protein. (A) SDS-PAGE. Lane 1, lysate from uninduced cells; lane 2, protein marker (P7708G, NEB); lane 3, lysate from cells induced with 0.5 mM isopropyl-1-thio-β-D-galactopyranoside at 25 °C for 4 h; lane 4, supernatant of the uninduced cells sonicated on ice and centrifuged at 10,000 × g for 30 min; lanes 5 and 6, pellet and supernatant, respectively, of the induced cell in the same treatment with lane 3. (B) Purification under native conditions purified using Ni-NTA Agarose with the indicated imidazole concentrations in the elution steps. Lane 1, protein marker (DM101, Transgen); lanes 2, 3, and 4, 50-mM, 100-mM, and 150-mM elution, respectively. The arrow points to the band corresponding to the HrdB protein.

**Table S1. Genes with at least a twofold higher expression level in the overproducer *S. avermitilis* 3-115**

| Accession number                         | Gene           | Function                                         | Ratio(3-115 / 31267) | Candidate for HrdB |
|------------------------------------------|----------------|--------------------------------------------------|----------------------|--------------------|
| <b>Sig-regulons</b>                      |                |                                                  |                      |                    |
| SAV4303                                  | <i>sig37</i>   | RNA polymerase ECF-subfamily sigma factor        | 2.02                 | +                  |
| SAV3843                                  |                | Anti-sigma factor antagonist                     | 2.29                 | -                  |
| SAV424                                   | <i>sig3</i>    | RNA polymerase ECF-subfamily sigma factor        | 2.36                 | +                  |
| SAV3012                                  | <i>rsbW</i>    | Anti-sigma factor                                | 2.74                 | -                  |
| <b>Gene transcription and regulation</b> |                |                                                  |                      |                    |
| SAV736                                   |                | Putative transcriptional regulator               | 2.22                 | -                  |
| SAV520                                   |                | Putative transcriptional regulator               | 2.67                 | -                  |
| SAV1728                                  |                | LacI-family transcriptional regulator            | 2.76                 | -                  |
| SAV143                                   |                | Putative TetR-family transcriptional regulator   | 2.86                 | -                  |
| SAV551                                   |                | Putative TetR-family transcriptional regulator   | 2.97                 | +                  |
| SAV2785                                  |                | Putative regulatory protein                      | 2.61                 | -                  |
| SAV537                                   |                | Putative Sir2-family regulator protein           | 2.17                 | -                  |
| SAV4703                                  |                | Two-component system sensor kinase               | 2.22                 | -                  |
| SAV4704                                  |                | Two-component system response regulator          | 2.12                 | -                  |
| SAV6039                                  |                | Two-component system sensor kinase               | 2.14                 | -                  |
| SAV129                                   |                | Two-component system response regulator          | 3.06                 | -                  |
| <b>Avermectin biosynthesis</b>           |                |                                                  |                      |                    |
| SAV953                                   | <i>aveG</i>    | Thioesterase                                     | 2.92                 | -                  |
| SAV935                                   | <i>aveR</i>    | LuxR-family transcriptional regulator            | 2.74                 | +                  |
| SAV940                                   | <i>aveC</i>    | CHC-B2:CHC-B1 ratio                              | 2.12                 | -                  |
| SAV937                                   | <i>aveD</i>    | C5-O-methyltransferase                           | 2.01                 | -                  |
| SAV938                                   | <i>aveA1</i>   | Type I polyketide synthase AVES 1                | 2.87                 | -                  |
| SAV942                                   | <i>aveAIII</i> | Type I polyketide synthase AVES 3                | 2.03                 | -                  |
| SAV947                                   | <i>aveBIII</i> | Glucose-1-phosphate thymidyltransferase          | 2.48                 | -                  |
| SAV948                                   | <i>aveBIV</i>  | dTDP-4-keto-6-deoxy-L-hexose 4-reductase         | 2.02                 | -                  |
| SAV949                                   | <i>aveBV</i>   | dTDP-4-keto-6-deoxyhexose 3,5-epimerase          | 2.20                 | -                  |
| <b>Energy metabolism</b>                 |                |                                                  |                      |                    |
| SAV1818                                  | <i>sucC1</i>   | Putative succinyl-CoA synthetase beta subunit    | 4.18                 | -                  |
| SAV2824                                  | <i>ackA</i>    | Putative acetate kinase                          | 4.72                 | -                  |
| SAV3566                                  | <i>ppc</i>     | Putative phosphoenolpyruvate carboxylase         | 2.86                 | -                  |
| <b>Transport</b>                         |                |                                                  |                      |                    |
| SAV4076                                  | <i>pitH1</i>   | Low-affinity inorganic phosphate transporter     | 2.16                 | -                  |
| SAV2185                                  |                | ABC transporter ATP-binding protein              | 2.76                 | -                  |
| <b>Amino acid metabolism</b>             |                |                                                  |                      |                    |
| SAV2918                                  | <i>thrA</i>    | Putative homoserine dehydrogenase                | 2.09                 | -                  |
| <b>Morphological differentiation</b>     |                |                                                  |                      |                    |
| SAV4604                                  | <i>ssgB</i>    | Morphological differentiation-associated protein | 2.04                 | +                  |

**Table S2. Avermectin biosynthetic genes and their comparative expression levels**

| ORF    | Gene / Function                                              | Ratio (3-115 / ATCC 31267) |
|--------|--------------------------------------------------------------|----------------------------|
| SAV935 | <i>aveR</i> (LuxR-family transcriptional regulator)          | 2.74                       |
| SAV936 | <i>aveF</i> (C-5 ketoreductase )                             | 1.02                       |
| SAV937 | <i>aveD</i> (C5-O-methyltransferase)                         | 2.01                       |
| SAV938 | <i>aveAI</i> (type I polyketide synthase AVES 1)             | 2.87                       |
| SAV939 | <i>aveAIII</i> (type I polyketide synthase AVES 2)           | 0.94                       |
| SAV940 | <i>aveC</i> (CHC-B2:CHC-B1 ratio)                            | 2.12                       |
| SAV941 | <i>aveE</i> (cytochrome P450 hydroxylase)                    | 0.60                       |
| SAV942 | <i>aveAIII</i> (type I polyketide synthase AVES 3)           | 2.03                       |
| SAV943 | <i>aveAIV</i> (type I polyketide synthase AVES 4)            | 0.97                       |
| SAV944 | <i>orf-1</i> (reductase)                                     | 1.62                       |
| SAV945 | <i>aveBI</i> (glycosyl transferase)                          | 0.36                       |
| SAV946 | <i>aveBII</i> (dTDP-glucose 4,6-dehydratase)                 | 0.30                       |
| SAV947 | <i>aveBIII</i> (glucose-1-phosphate thymidyltransferase)     | 2.48                       |
| SAV948 | <i>aveBIV</i> (dTDP-4-keto-6-deoxy-L-hexose 4-reductase)     | 2.02                       |
| SAV949 | <i>aveBV</i> (dTDP-4-keto-6-deoxyhexose 3,5-epimerase)       | 2.20                       |
| SAV950 | <i>aveBVI</i> (dTDP-4-keto-6-deoxy-L-hexose2,3-dehydratase)  | 0.90                       |
| SAV951 | <i>aveBVII</i> (dTDP-6-deoxy-L-hexose 3-O-methyltransferase) | 0.72                       |
| SAV952 | <i>aveBVIII</i> (dTDP-4-keto-6-deoxy-L-hexose 2,3-reductase) | 0.69                       |
| SAV953 | <i>aveG</i> (thioesterase)                                   | 2.92                       |

**Table S3. Comparison of the production of a strain containing mutant *hrdB* rescued from the yield-improved strains against 3-115**

| Relative titer of avermectin B1a (%) |               |
|--------------------------------------|---------------|
| 3-115                                | 100           |
| A56                                  | 152.20 ± 3.87 |
| A393                                 | 146.11 ± 3.42 |
| pZY148- <i>hrdB</i> <sup>A56</sup>   | 148.23 ± 2.36 |
| pZY150- <i>hrdB</i> <sup>A393</sup>  | 144.65 ± 3.56 |

Five transformants of the pZY148-*hrdB*<sup>A56</sup> and pZY150-*hrdB*<sup>A393</sup> were randomly picked for analysis.

**Table S4. Primers used in this study**

| Gene                                | Length (bp) | Sequence (5'-3')  |                                  |
|-------------------------------------|-------------|-------------------|----------------------------------|
| <b>RT-PCR analysis</b>              |             |                   |                                  |
| <i>aveR</i>                         | 158         | <i>aveR</i> -F    | AGGGAGTTTCCTGTCTGCAC             |
|                                     |             | <i>aveR</i> -R    | ACTCTTCCACAGCCCATTC              |
| <i>aveAI</i>                        | 223         | <i>aveAI</i> -F   | ACCAGCAACCCAGACCAAC              |
|                                     |             | <i>aveAI</i> -R   | CGGAGGAGTAGAGGACGAAAG            |
| <i>aveAIII</i>                      | 243         | <i>aveAIII</i> -F | AGACGTGACCCTTCAGGTTG             |
|                                     |             | <i>aveAIII</i> -R | TGATCGTAAGCCGTGTTTCAG            |
| 16S rRNA                            | 225         | rRNA-F            | CTCGTGTGAGATGTTGG                |
|                                     |             | rRNA-R            | TGAGATTCGCTCCACCTTG              |
| <b>In vitro transcription assay</b> |             |                   |                                  |
| <i>rrnDp</i>                        | 629         | <i>AvrrnDR</i>    | GATGTGCGTTGCCCTCCG               |
|                                     |             | <i>AvrrnDF</i>    | CCAGCGTTCGTCCTGAGCCA             |
| <i>aveRp</i>                        | 452         | EM06F             | CCCTCTGGACCCCTTGCTCG             |
|                                     |             | EM06R             | GGTGCAGACAGGAACTCCCT             |
| <i>aveAlp</i>                       | 354         | EM07F             | GGTCGGGAACCTCCGCAATC             |
|                                     |             | EM07R             | GCCGTCCATCCTCTGCACCT             |
| <b>Library construction</b>         |             |                   |                                  |
| <i>hrdB1</i>                        | 2352        | XAP1              | CACTCTAGACCCTGAGGTGGAGCGTGTG     |
|                                     |             | EAP2              | CTCGAATTCGGTCATGGAATACCCAGAGTGAT |
| <i>hrdB</i>                         | 1560        | AP3               | TGTTCTGTGTCGGCCAGCAC             |
|                                     |             | AP4               | TGCGTACAGCCGAGACCTAGTC           |
